# Supplementary material for: Nascent Titanium/Silicon-Containing Particle Formation in Corona Discharge Assisted Combustion
Source: Copernicus journal article supplement (doi:10.5194/ar-2025-41), 2026-01-02
Supplement: Supplementary file 1 [file ar-2025-41-supplement.pdf]

# Nascent Titanium/Silicon-Containing Particle Formation in Corona Discharge Assisted Combustion

Chanakya Bagya Ramesh<sup>1</sup>, Frank Daoru Han<sup>2</sup>, Yang Wang<sup>1</sup>

- 5   <sup>1</sup>Department of Chemical, Environmental, and Materials Engineering, University of Miami, Coral Gables, Florida, 33146, United States  
     <sup>2</sup>Department of Mechanical and Aerospace Engineering, Missouri University of Science and Technology, Rolla, Missouri, 65409, United States

Correspondence to: Yang Wang (yangwang@miami.com)

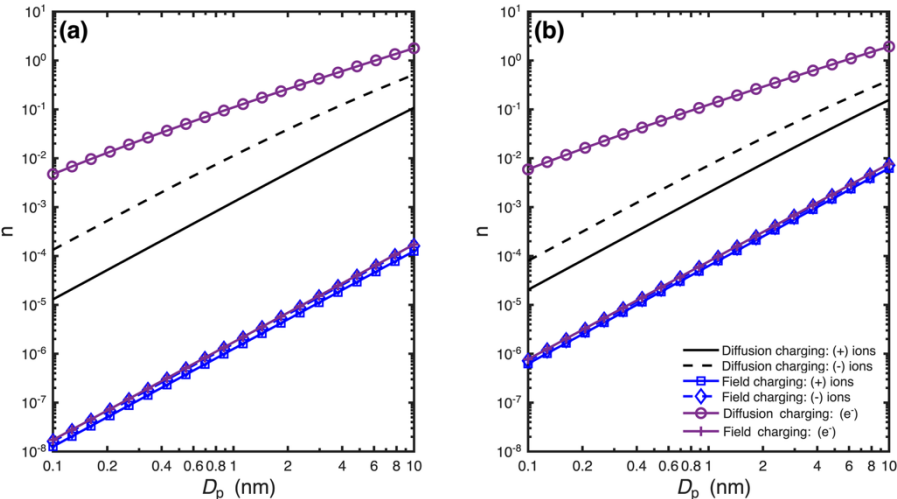

Figure S1: Shows the charge acquired by Si-containing particles with a dielectric constant of 3.9 from diffusion and field charging in (a) flame only condition and (b) PAC with a plasma of power 125W.
